# Supplementary material for: Methacrylated Gelatin as a Scaffold for Mechanically Isolated Stromal Vascular Fraction for Cutaneous Wound Repair
Source: MDPI journal article supplement (doi:10.3390/ijms241813944), 2023-09-11
Supplement: s1 [file s1]

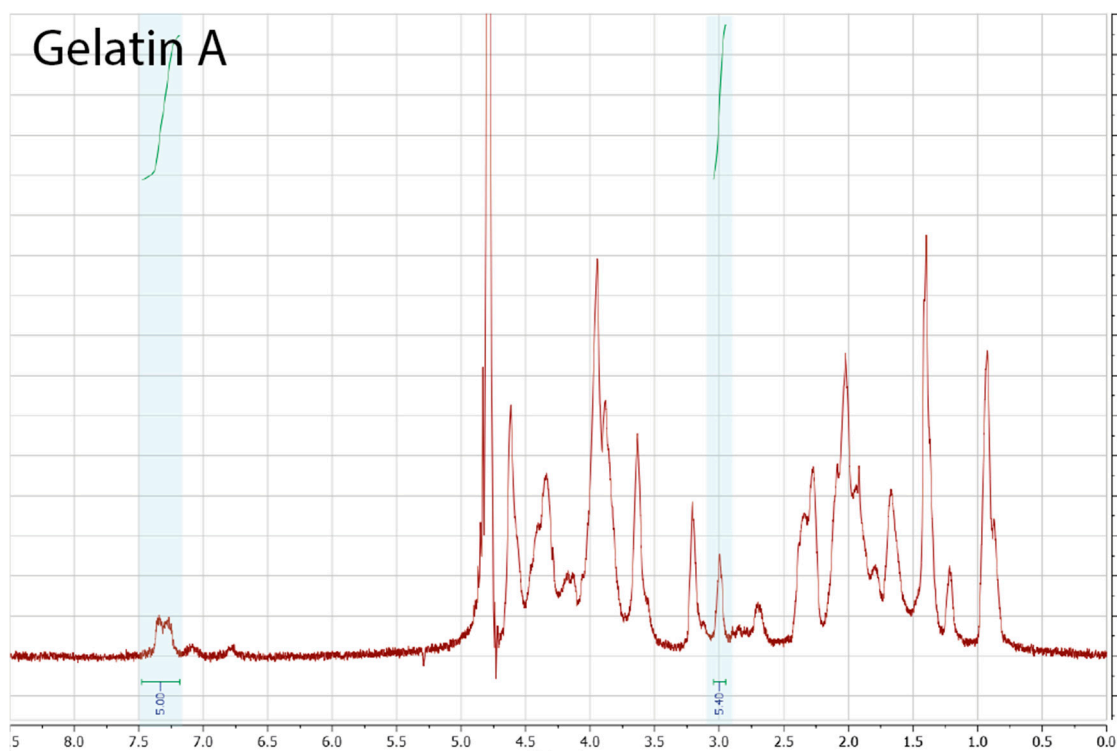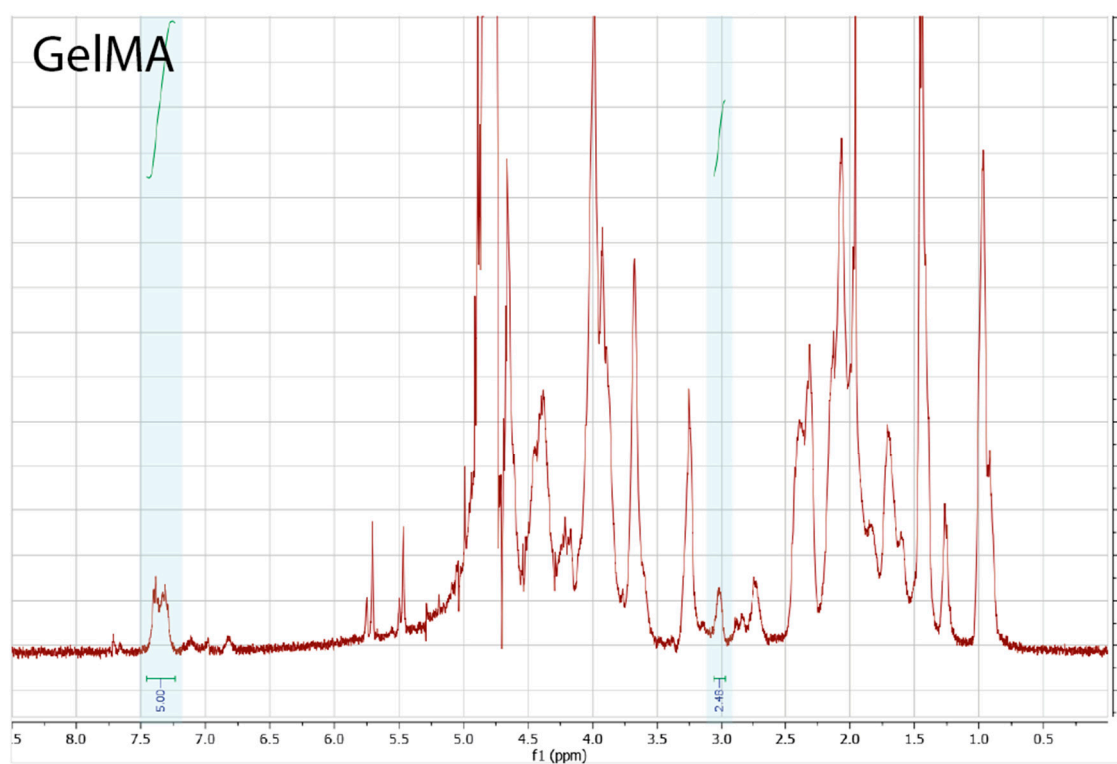

**Figure S1:**  $^1\text{H}$  NMR in  $\text{D}_2\text{O}$  of gelatin (top) and GelMA (bottom). GelMA degree of functionalization ( $\sim 55\%$ ) was quantified from the ratio of the integrated area of the lysine methylene signals (2.8–3.0 ppm) of GelMA and unmodified gelatin using the phenylalanine signal (7.1–7.4 ppm) as a reference.
